# Supplementary material for: Photodynamic Inactivation of Microorganisms Using Semisynthetic Chlorophyll a Derivatives as Photosensitizers
Source: MDPI journal article supplement (doi:10.3390/molecules27185769), 2022-09-06
Supplement: s1 [file s1]

# Supporting Information

## Photodynamic Inactivation of Microorganisms Using Semi-Synthetic Chlorophyll a Derivatives as Photosensitizers

Marciana Pierina Uliana<sup>1,2,3\*</sup>, Andréia da Cruz Rodrigues<sup>3</sup>, Bruno Andrade Ono<sup>1</sup>, Sebastião Pratavieira<sup>1</sup>, Kleber Thiago de Oliveira<sup>2</sup> and Cristina Kurachi<sup>1</sup>

1 Instituto de Física de São Carlos, Universidade de São Paulo, CEP 13560-970, São Carlos, SP, Brazil

2 Departamento de Química, Universidade Federal de São Carlos, Rodovia Washington Luís, km 235 - SP-310, 13565-905, São Carlos - SP – Brazil;

3 Universidade Federal da Integração Latino-Americana, CEP 85866-000, Caixa Postal 2044, Foz do Iguaçu, PR, Brazil; [marciana.machado@unila.edu.br](mailto:marciana.machado@unila.edu.br) (M. P. U)

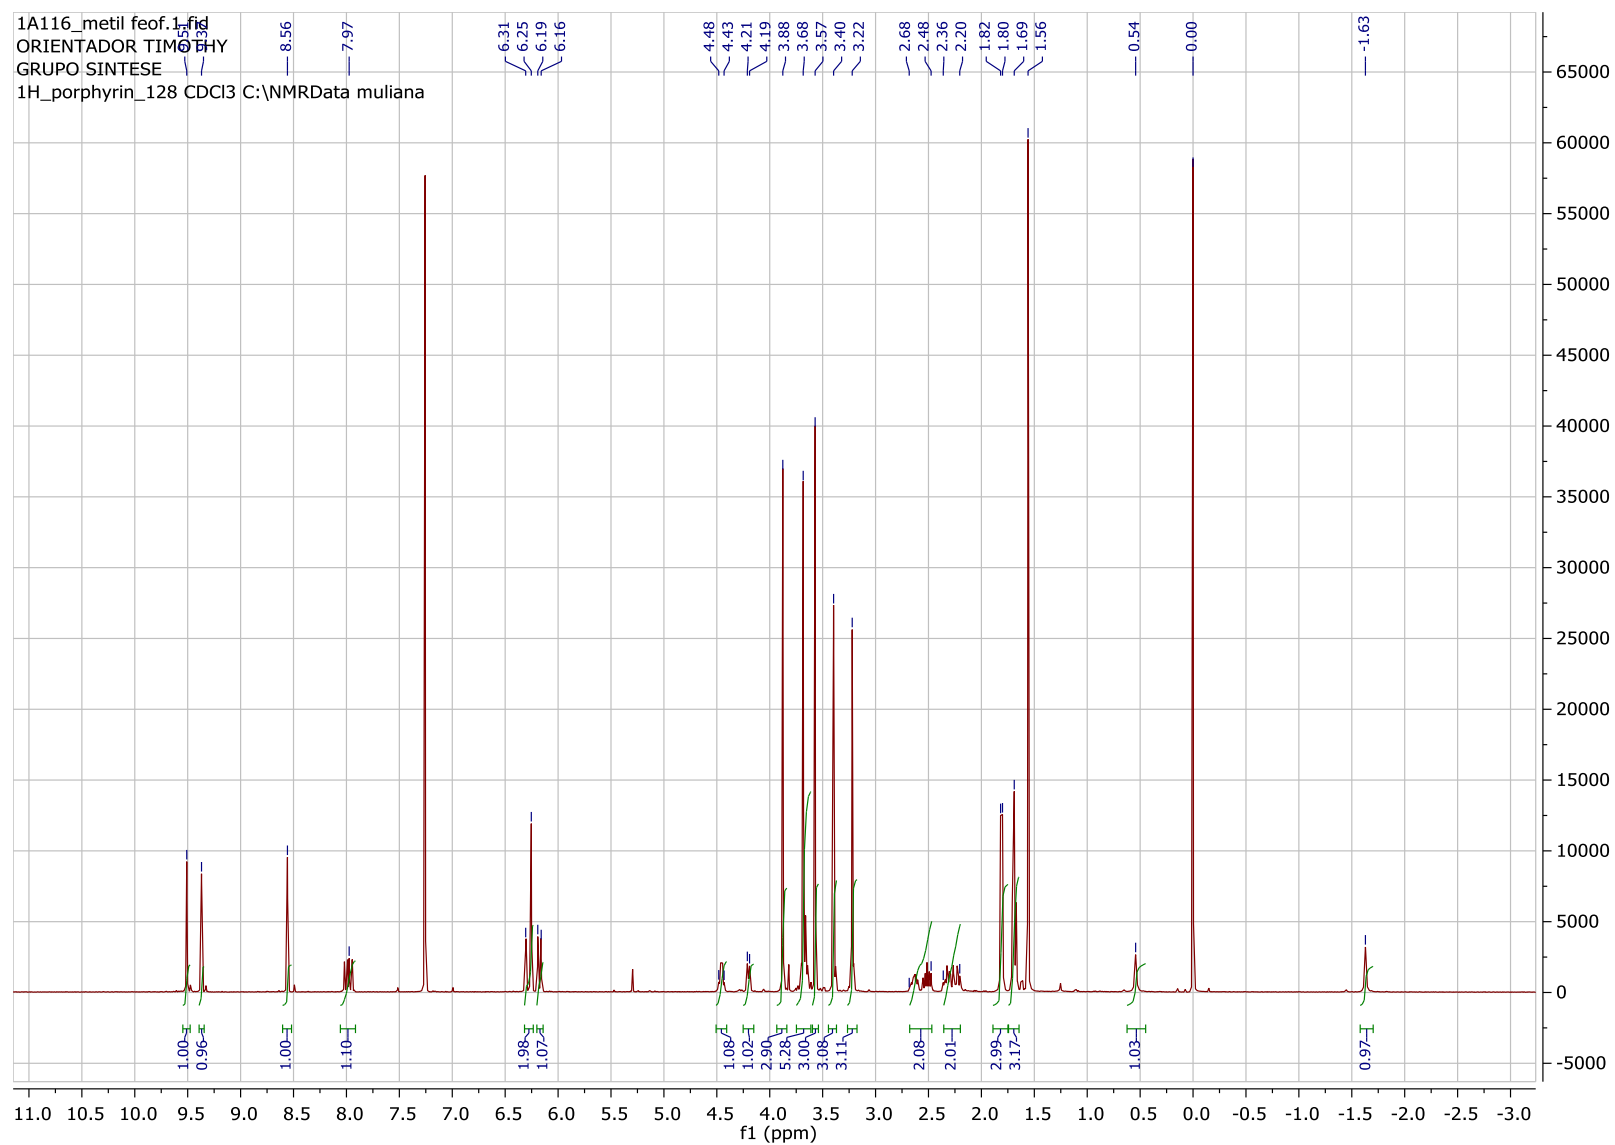

**Figure S1:**  $^1\text{H}$ -NMR ( $\text{CDCl}_3$ ) spectrum of methyl pheophorbide-*a* (**1**)

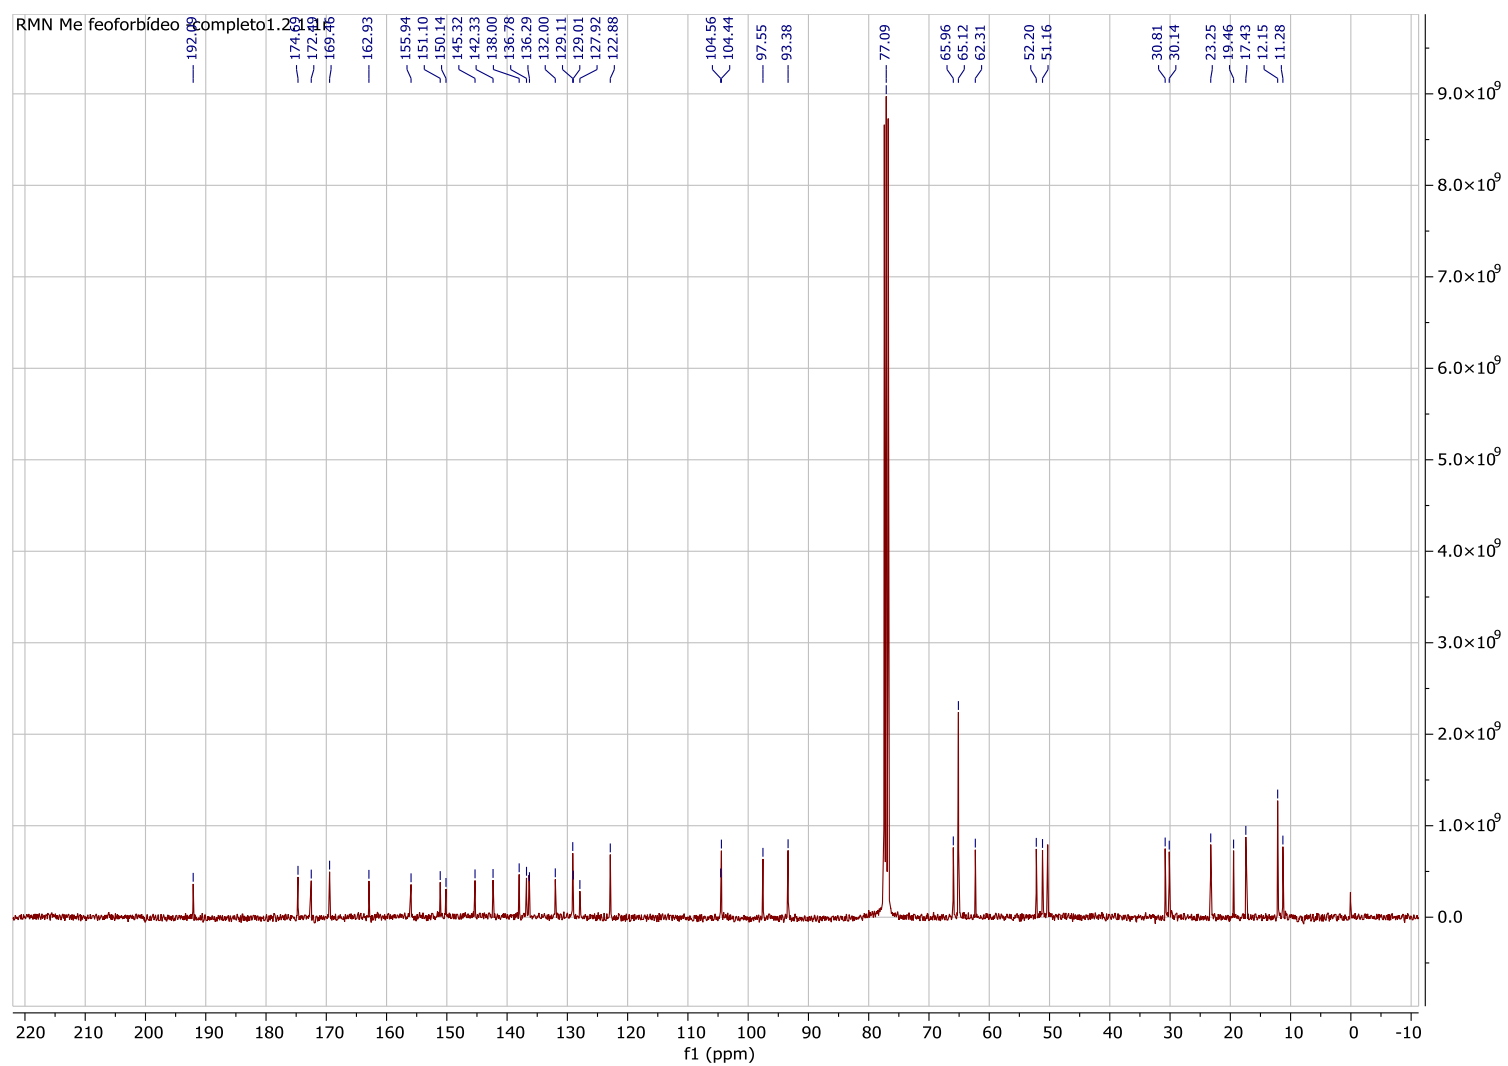

**Figure S2:**  $^{13}\text{C}$ -NMR ( $\text{CDCl}_3$ ) spectrum of methyl pheophorbide-*a* (**1**)

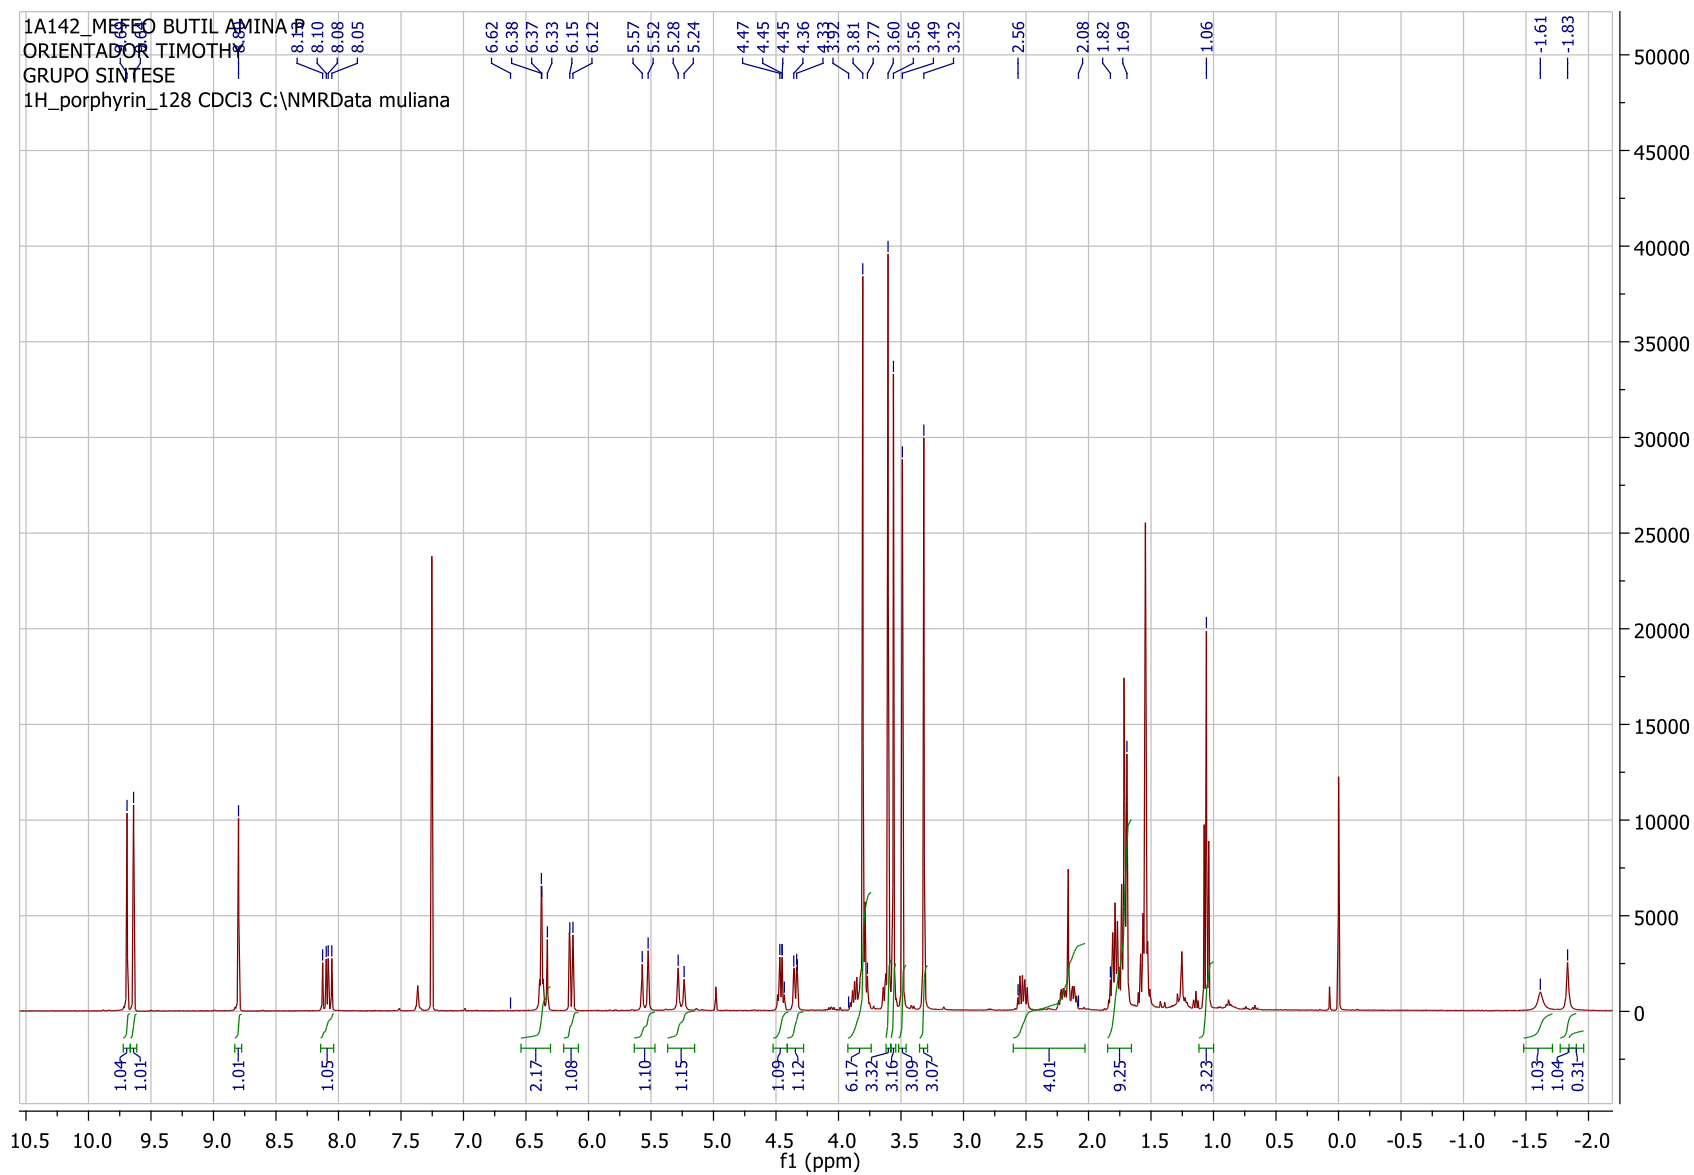

**Figure S3:**  $^1\text{H}$ -NMR ( $\text{CDCl}_3$ ) spectrum of 13-(Butylcarbamoyl)chlorin *e*6 15,17-dimethyl ester (**2**)

mefeobutil+\_150303151426 #4 RT: 0.14 AV: 1 NL: 8.88E7  
T: FTMS + p ESI Full ms [500.00-1000.00]

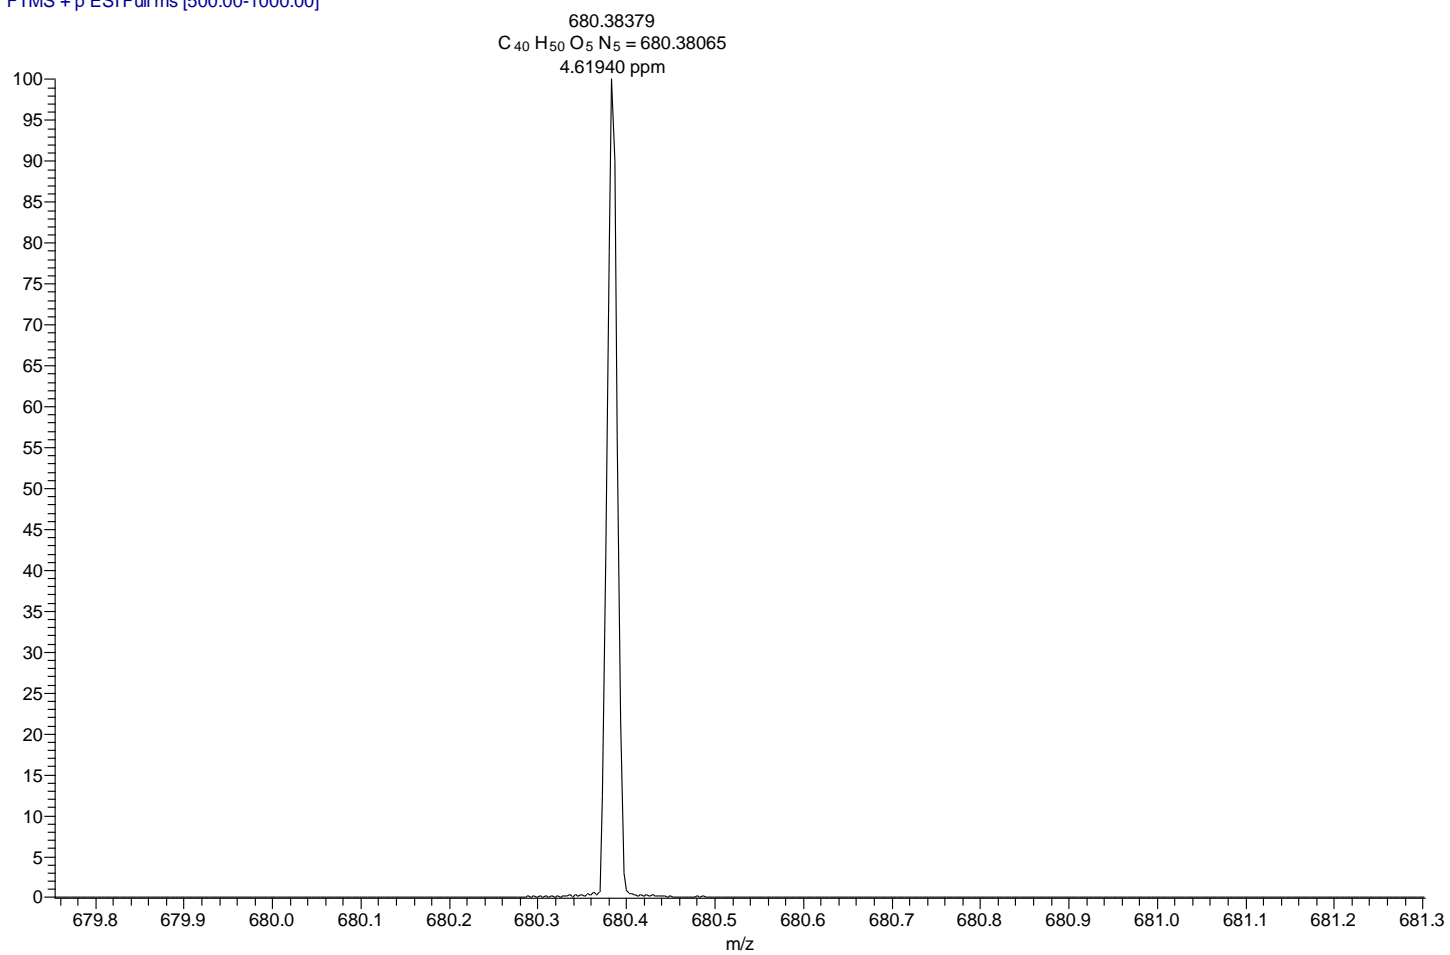

**Figure S4:** HRMS (ESI) of 13-(Butylcarbamoyl)chlorin *e*6 15,17-dimethyl ester (**2**)

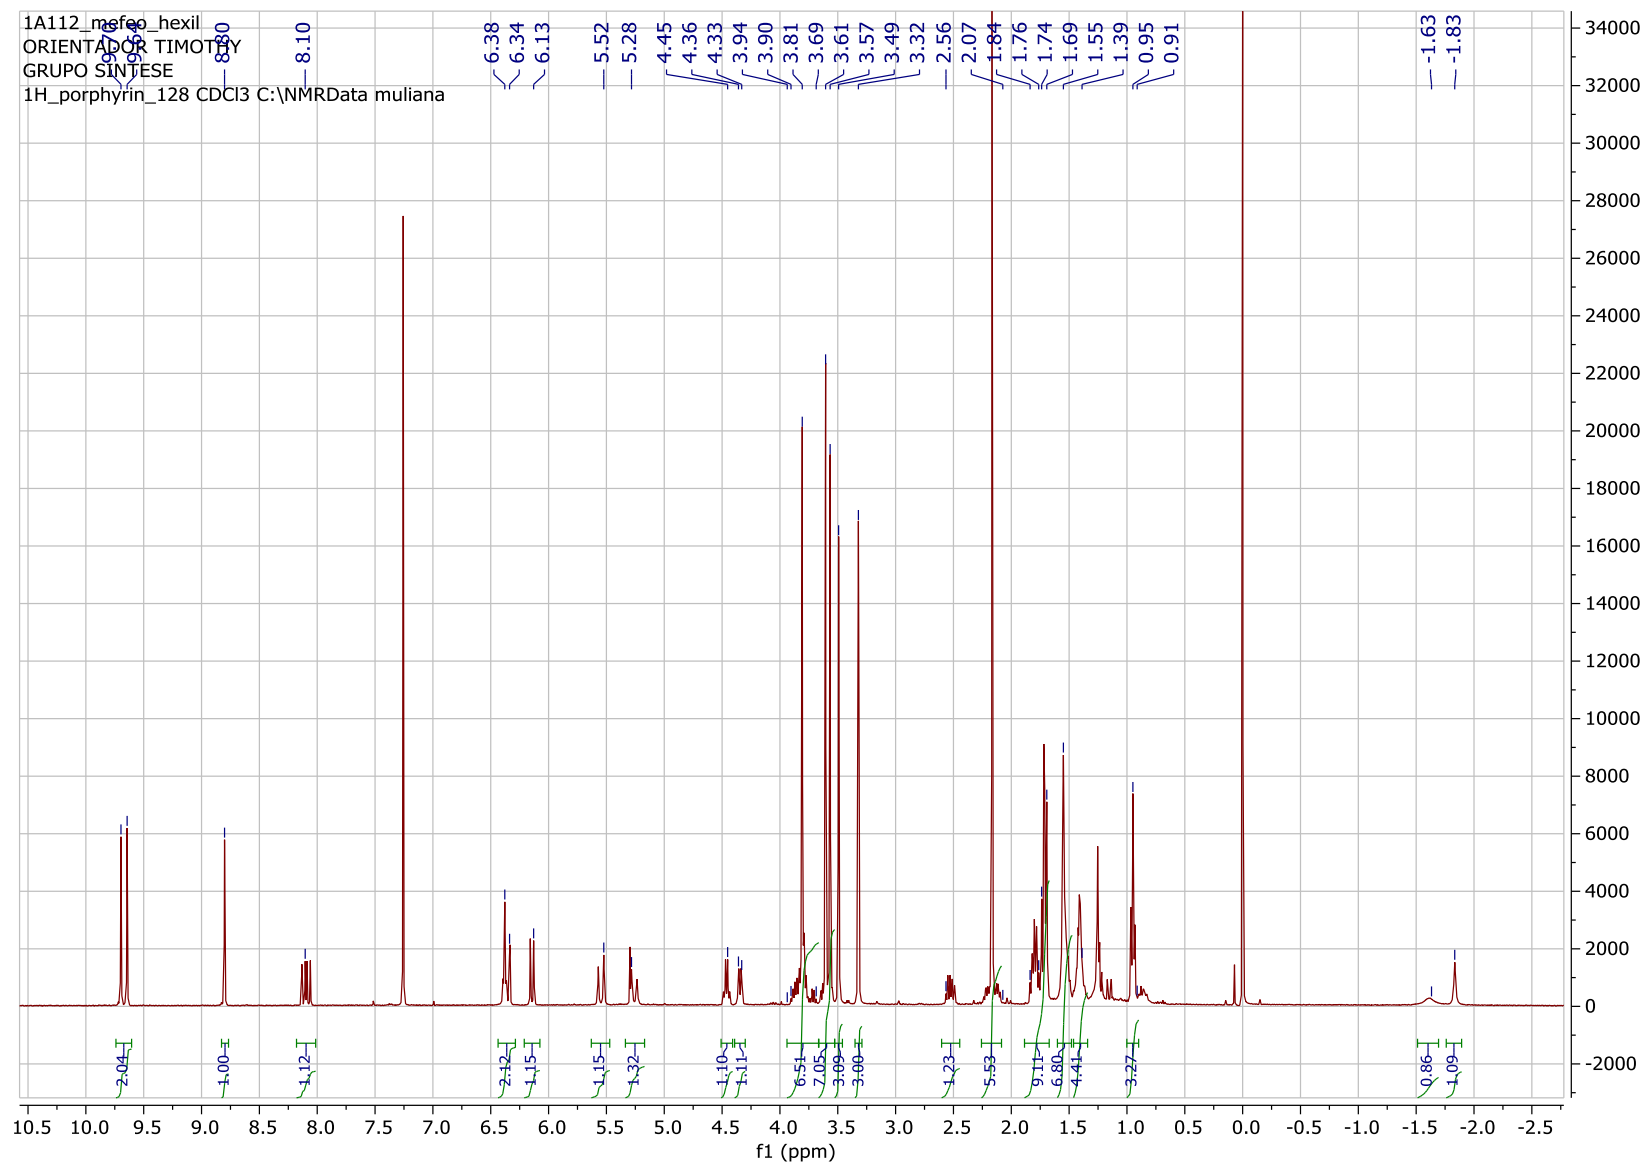

**Figure S5:**  $^1\text{H}$ -NMR ( $\text{CDCl}_3$ ) spectrum of 13-(Hexylcarbamoyl)chlorin e6 15,17-dimethyl ester (**3**)

mefeohehil+\_150303153159 #1 RT: 0.01 AV: 1 NL: 7.55E7  
T: FTMS +p ESI Full ms [500.00-1000.00]

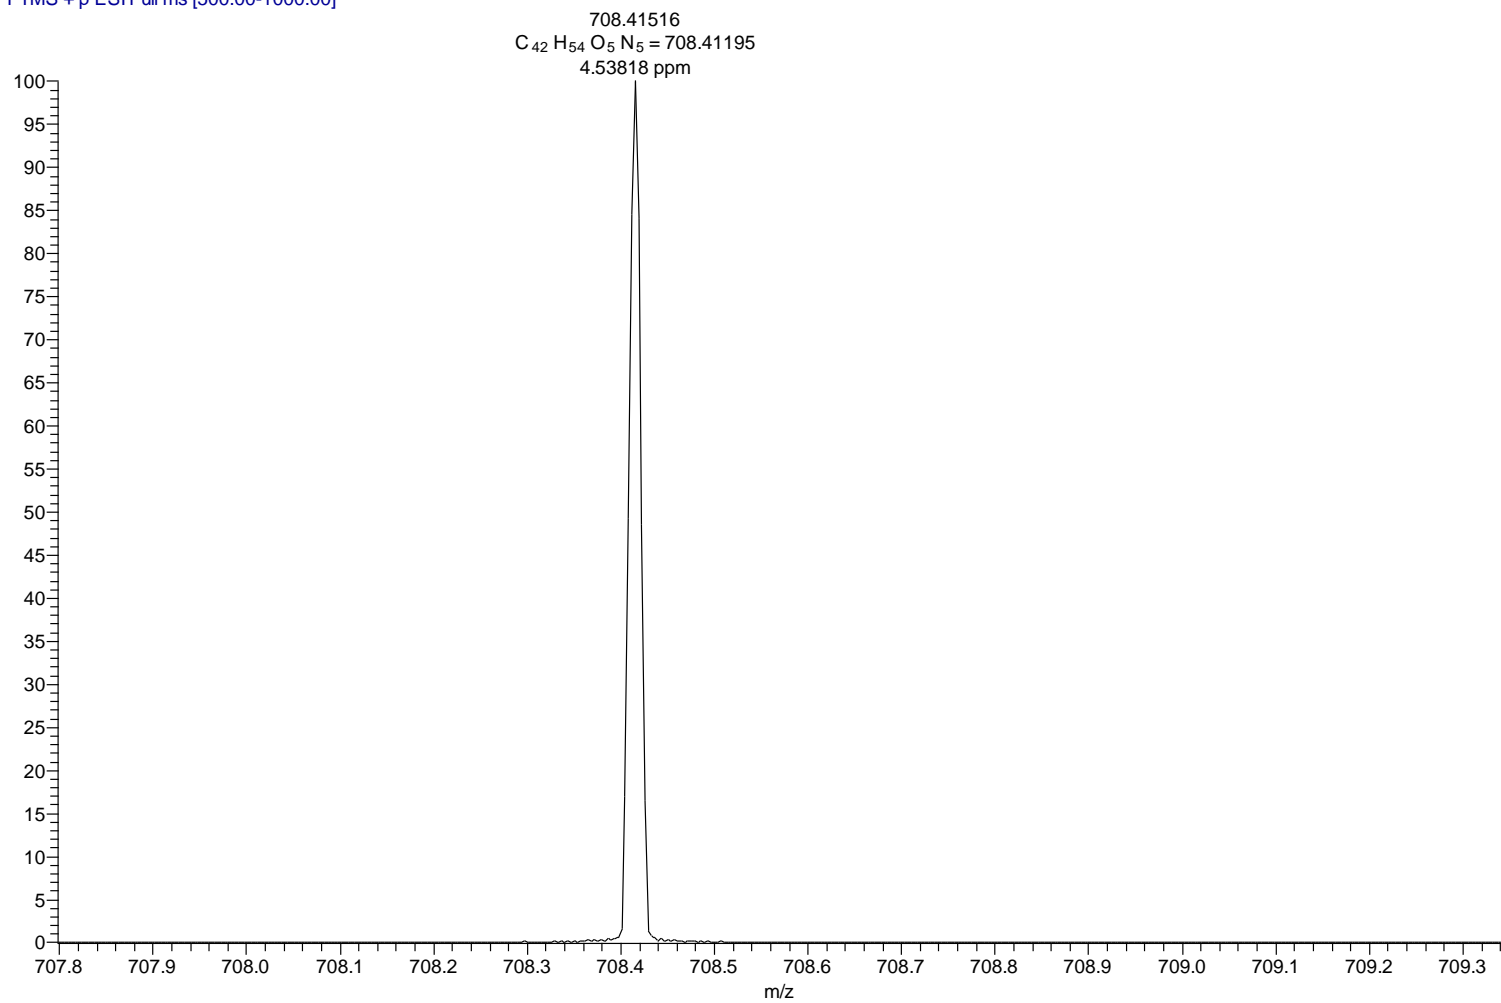

**Figure S6:** HRMS (ESI) of 13-(Hexylcarbamoyl)chlorin *e*6 15,17-dimethyl ester (**3**)

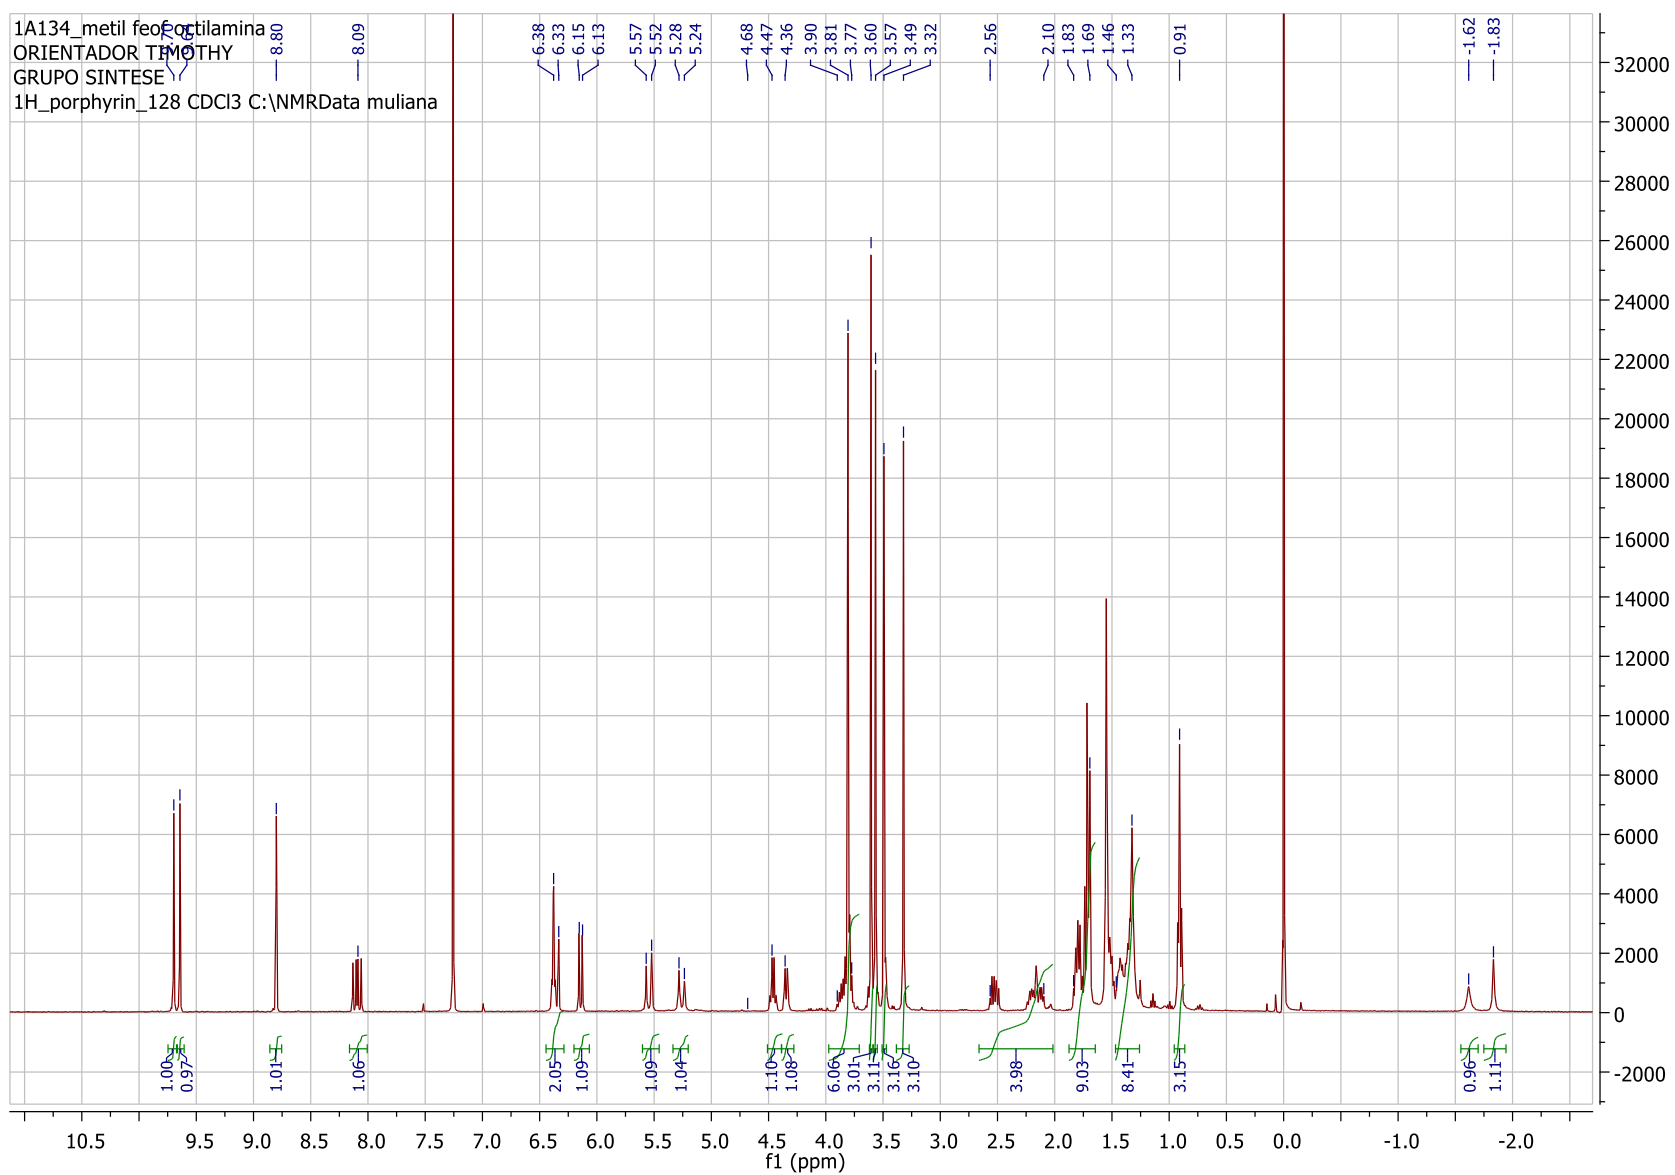

**Figure S7:**  $^1\text{H}$ -NMR ( $\text{CDCl}_3$ ) spectrum of 13-(Octylcarbamoyl)chlorin *e6* 15,17-dimethyl ester (**4**)



mefeoctil+\_150303155145 #4 RT: 0.14 AV: 1 NL: 3.09E7  
T: FTMS + p ESI Full ms [700.00-800.00]

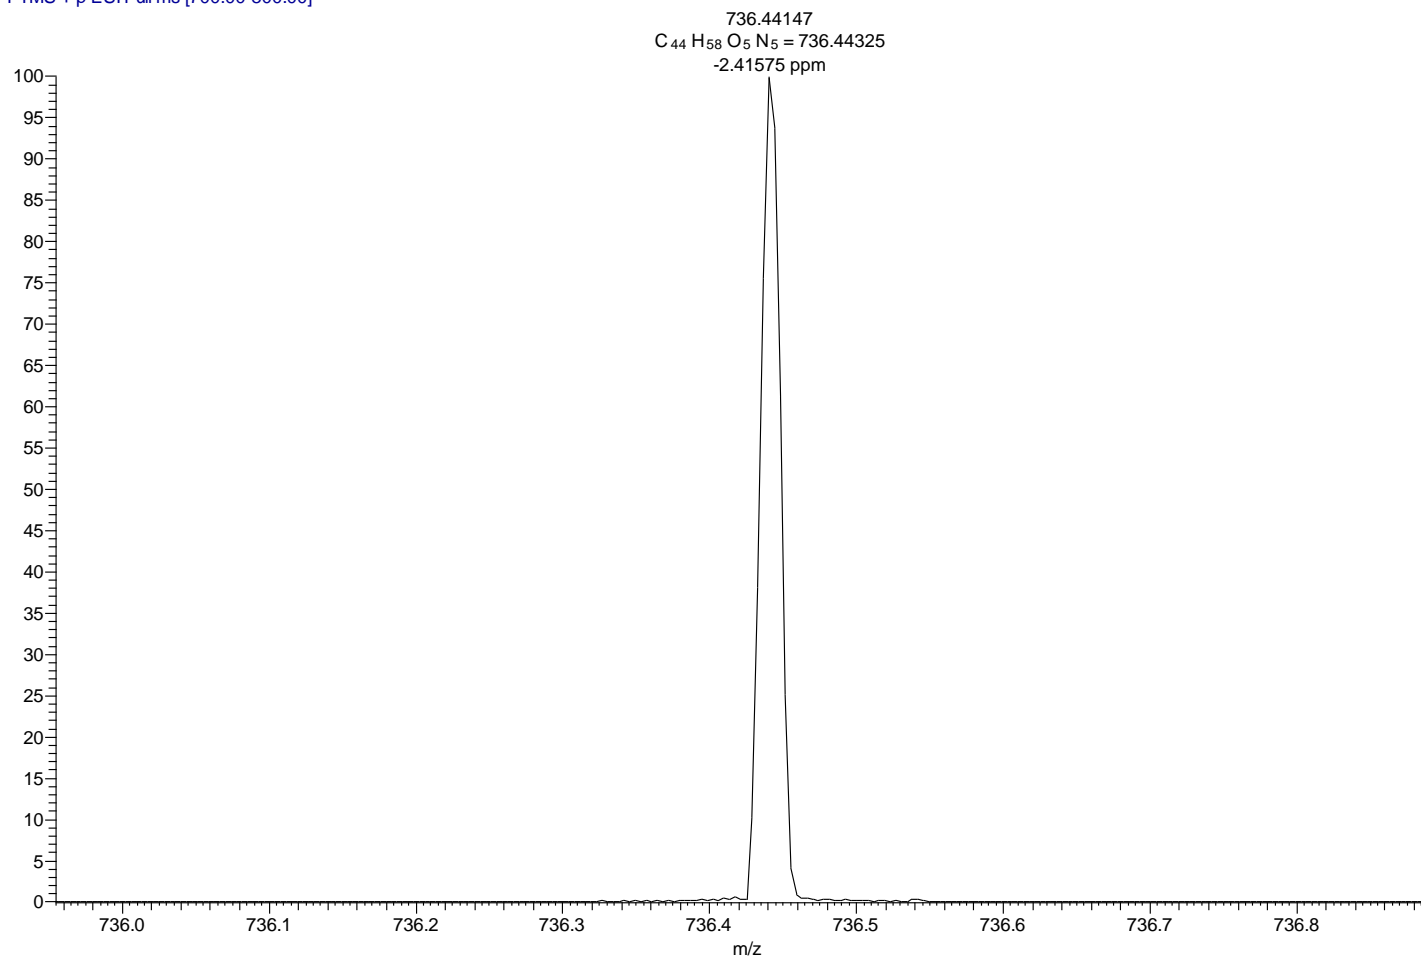

**Figure S8:** HRMS (ESI) of 13-(Octylcarbamoyl)chlorin *e*6 15,17-dimethyl ester (**4**)

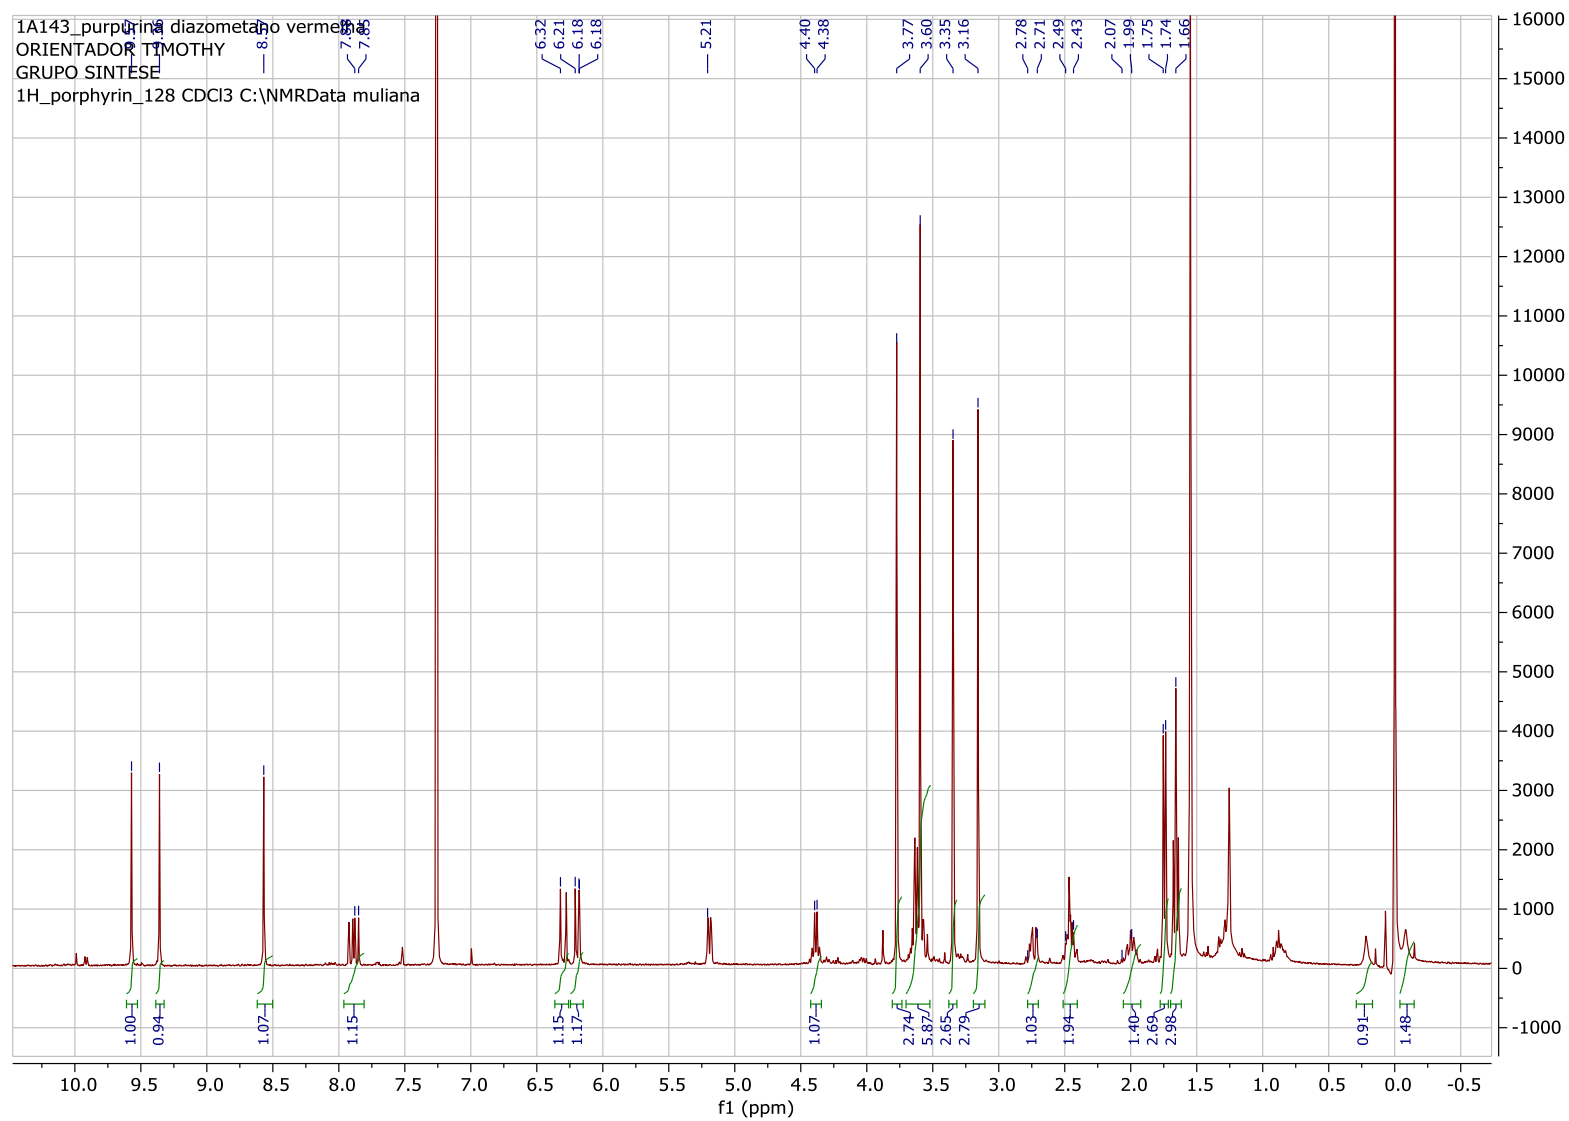

**Figure S9:**  $^1\text{H}$ -NMR ( $\text{CDCl}_3$ ) spectrum of Purpurin-18 Methyl Ester (**5**)

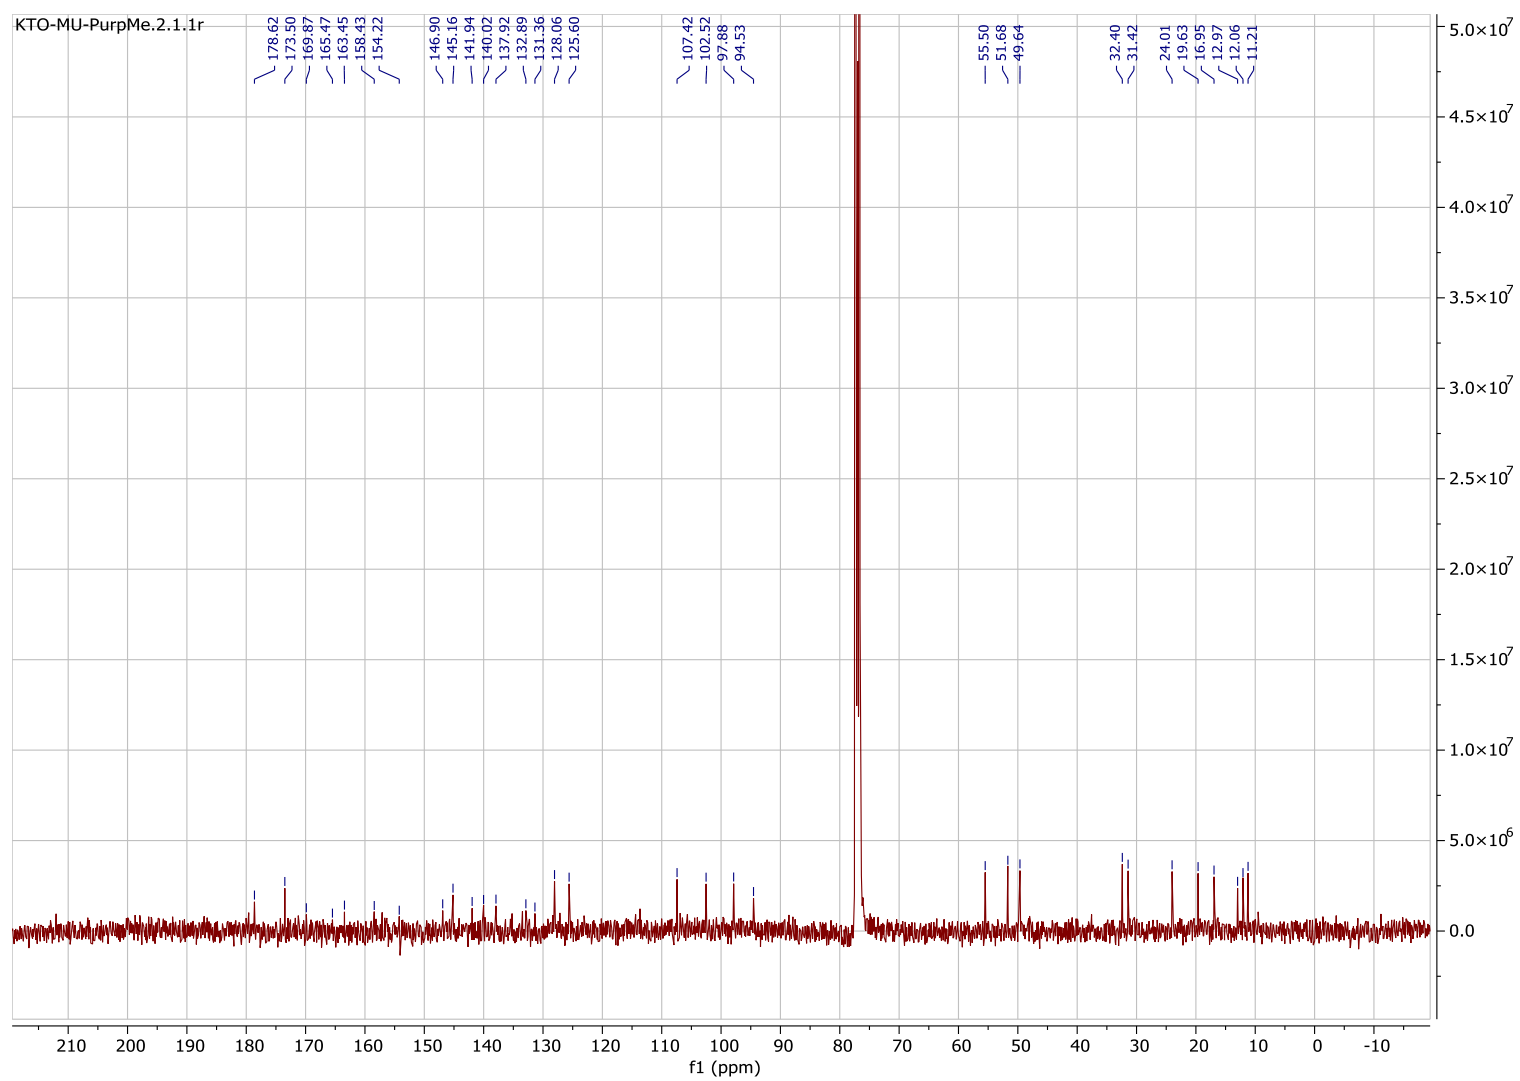

**Figure S10:**  $^{13}\text{C}$ -NMR ( $\text{CDCl}_3$ ) spectrum of Purpurin-18 Methyl Ester (**5**)

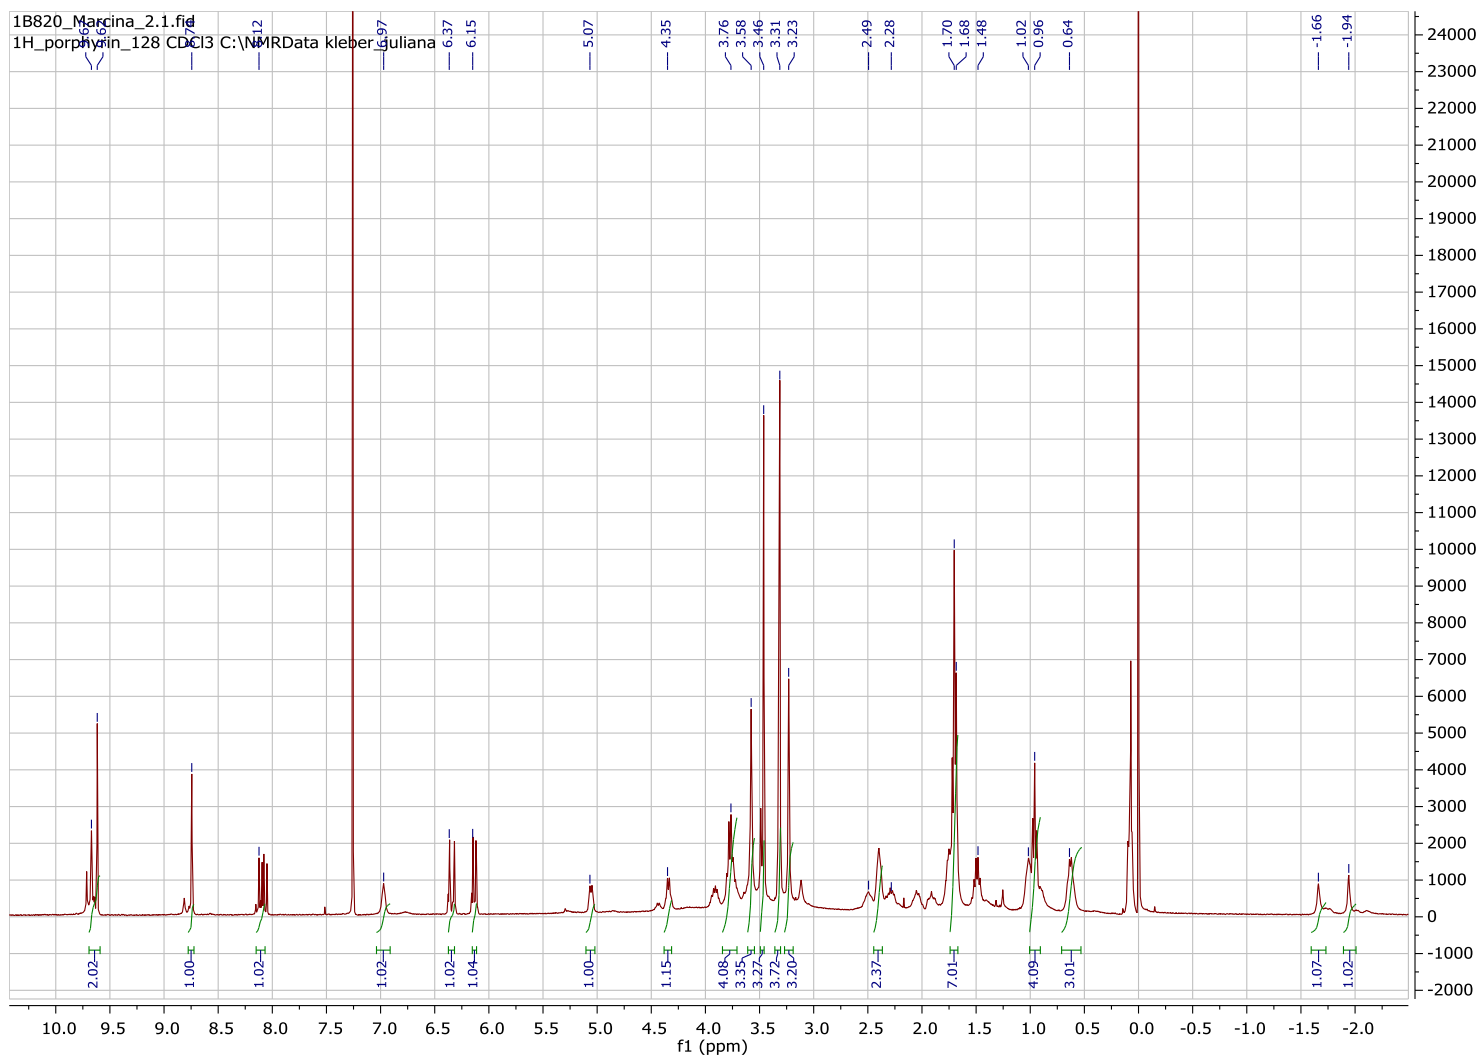

**Figure S11:**  $^1\text{H}$ -NMR ( $\text{CDCl}_3$ ) spectrum of Chlorin-p, 6-N-Butylamide-7-methyl Ester (**6**)

pupurinabutil(+)\_150303150500 #1 RT: 0.01 AV: 1 NL: 8.46E7  
T: FTMS + p ESI Full ms [600.00-700.00]

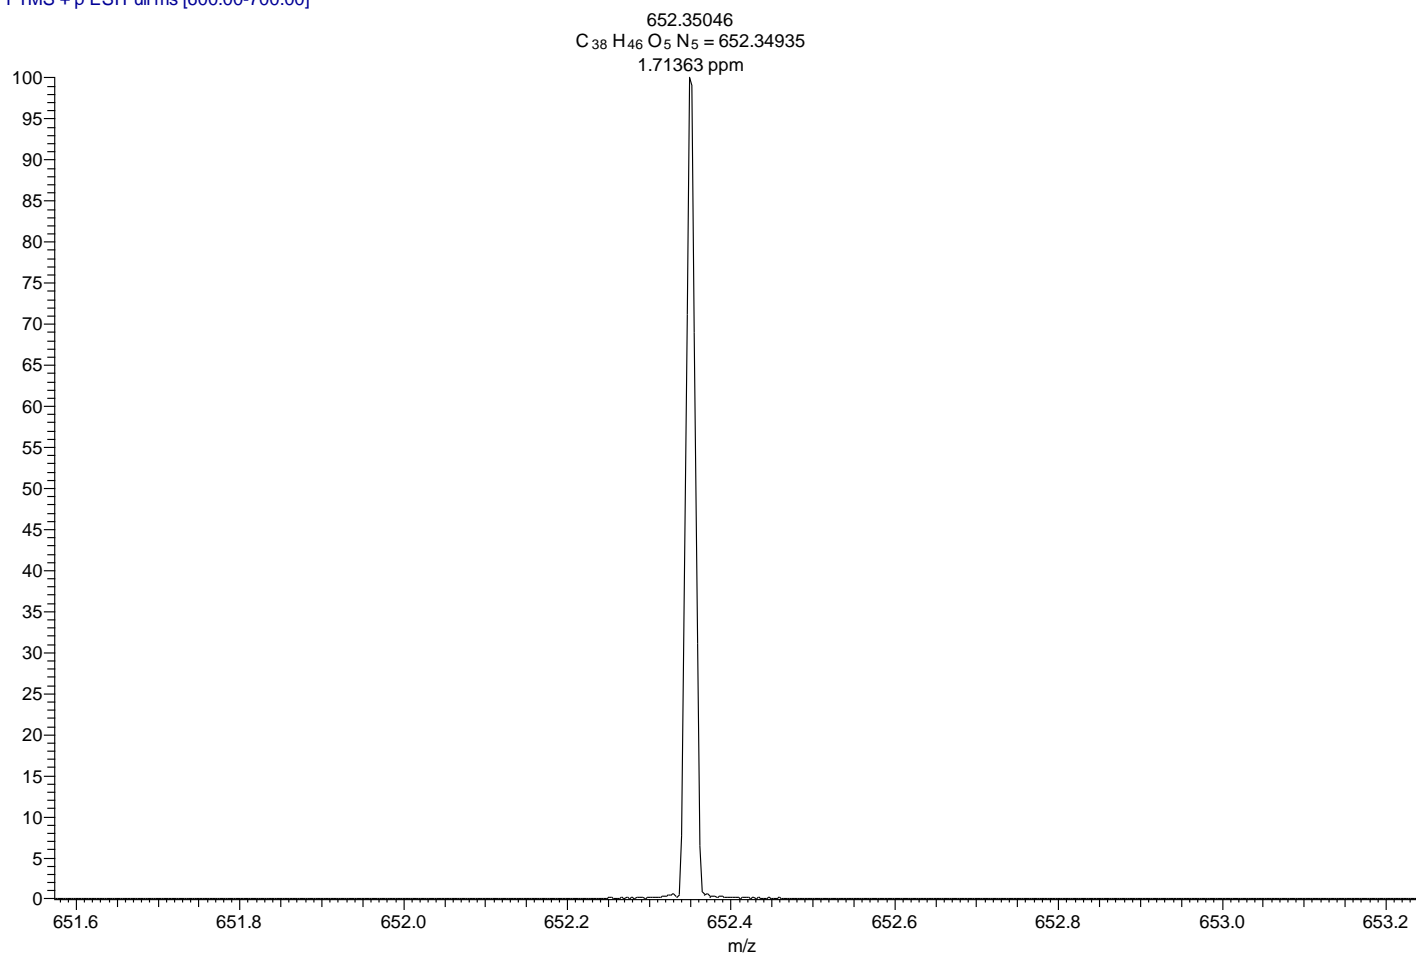

**Figure S12:** HRMS (ESI) of Chlorin-p, 6-N-Butylamide-7-methyl Ester (**6**)

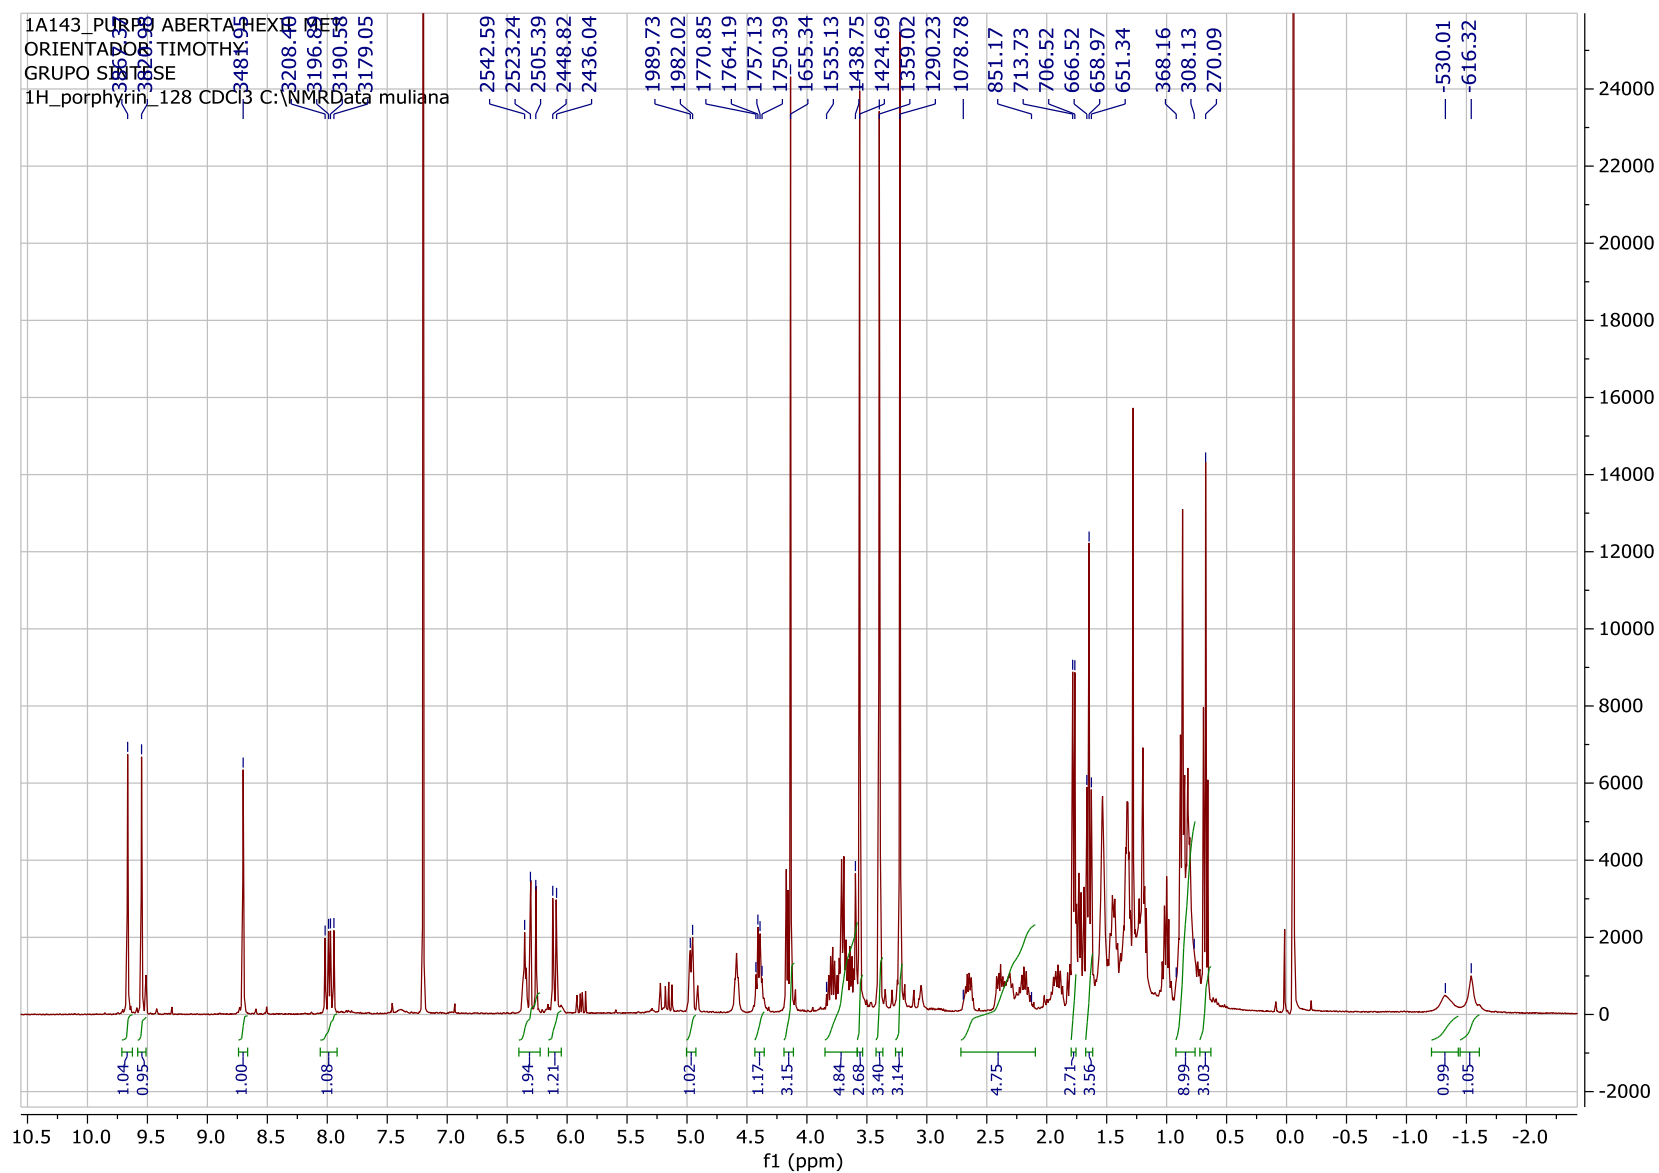

purpurina hexil(+)\_150110103539 #1 RT: 0.01 AV: 1 NL: 7.18E6  
T: FTMS + p ESI Full ms [650.00-750.00]

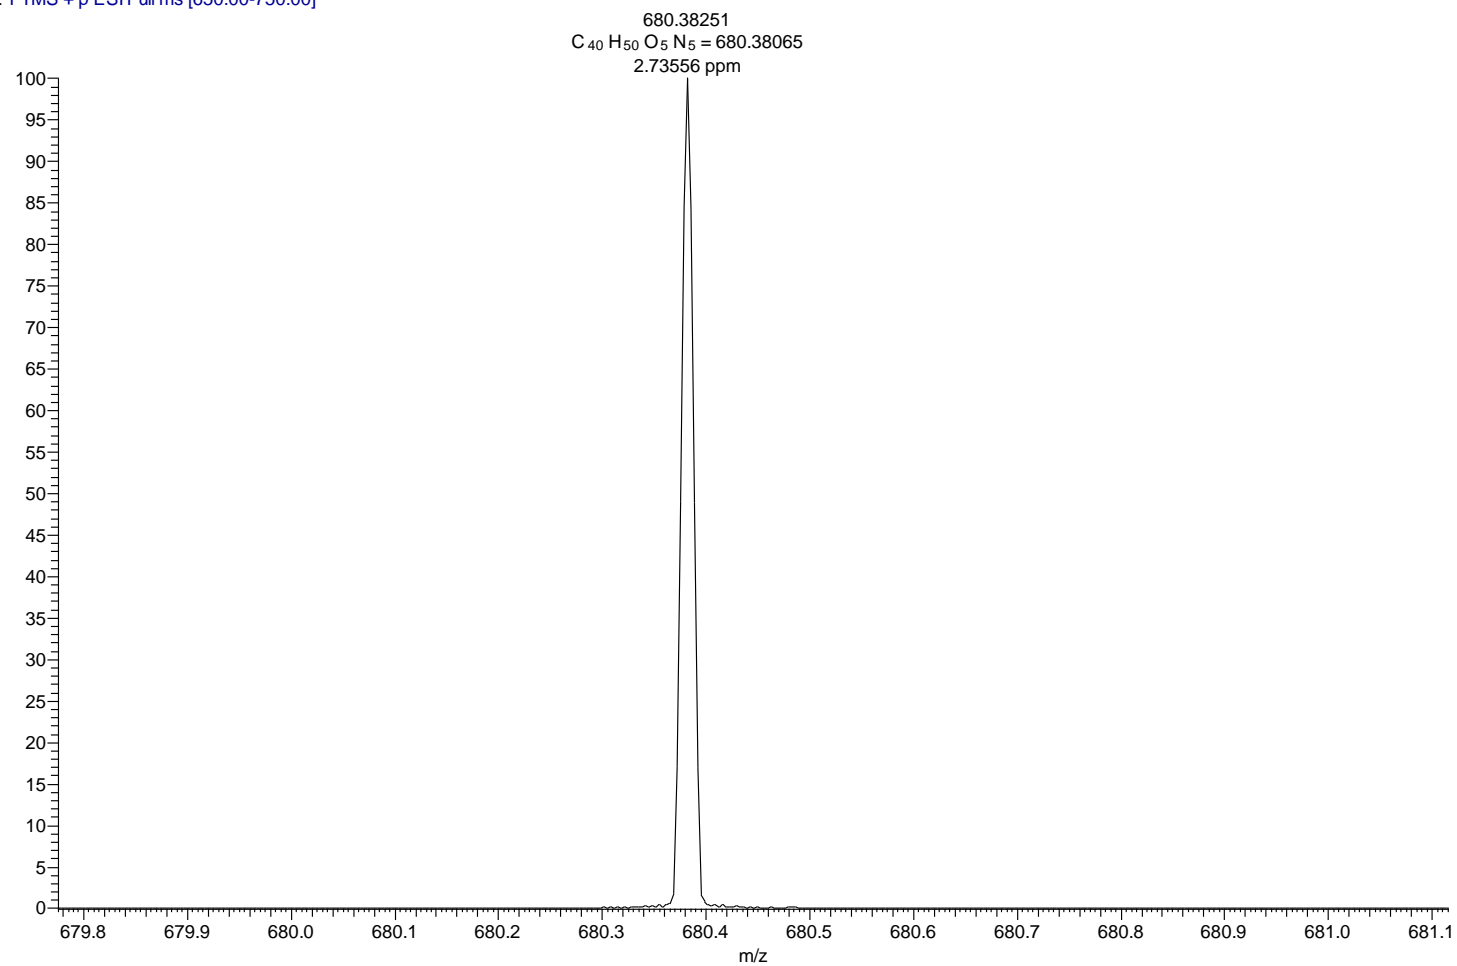

**Figure S14:** HRMS (ESI) of Chlorin-p, 6-N-hexylamide-7-methyl Ester (**7**)

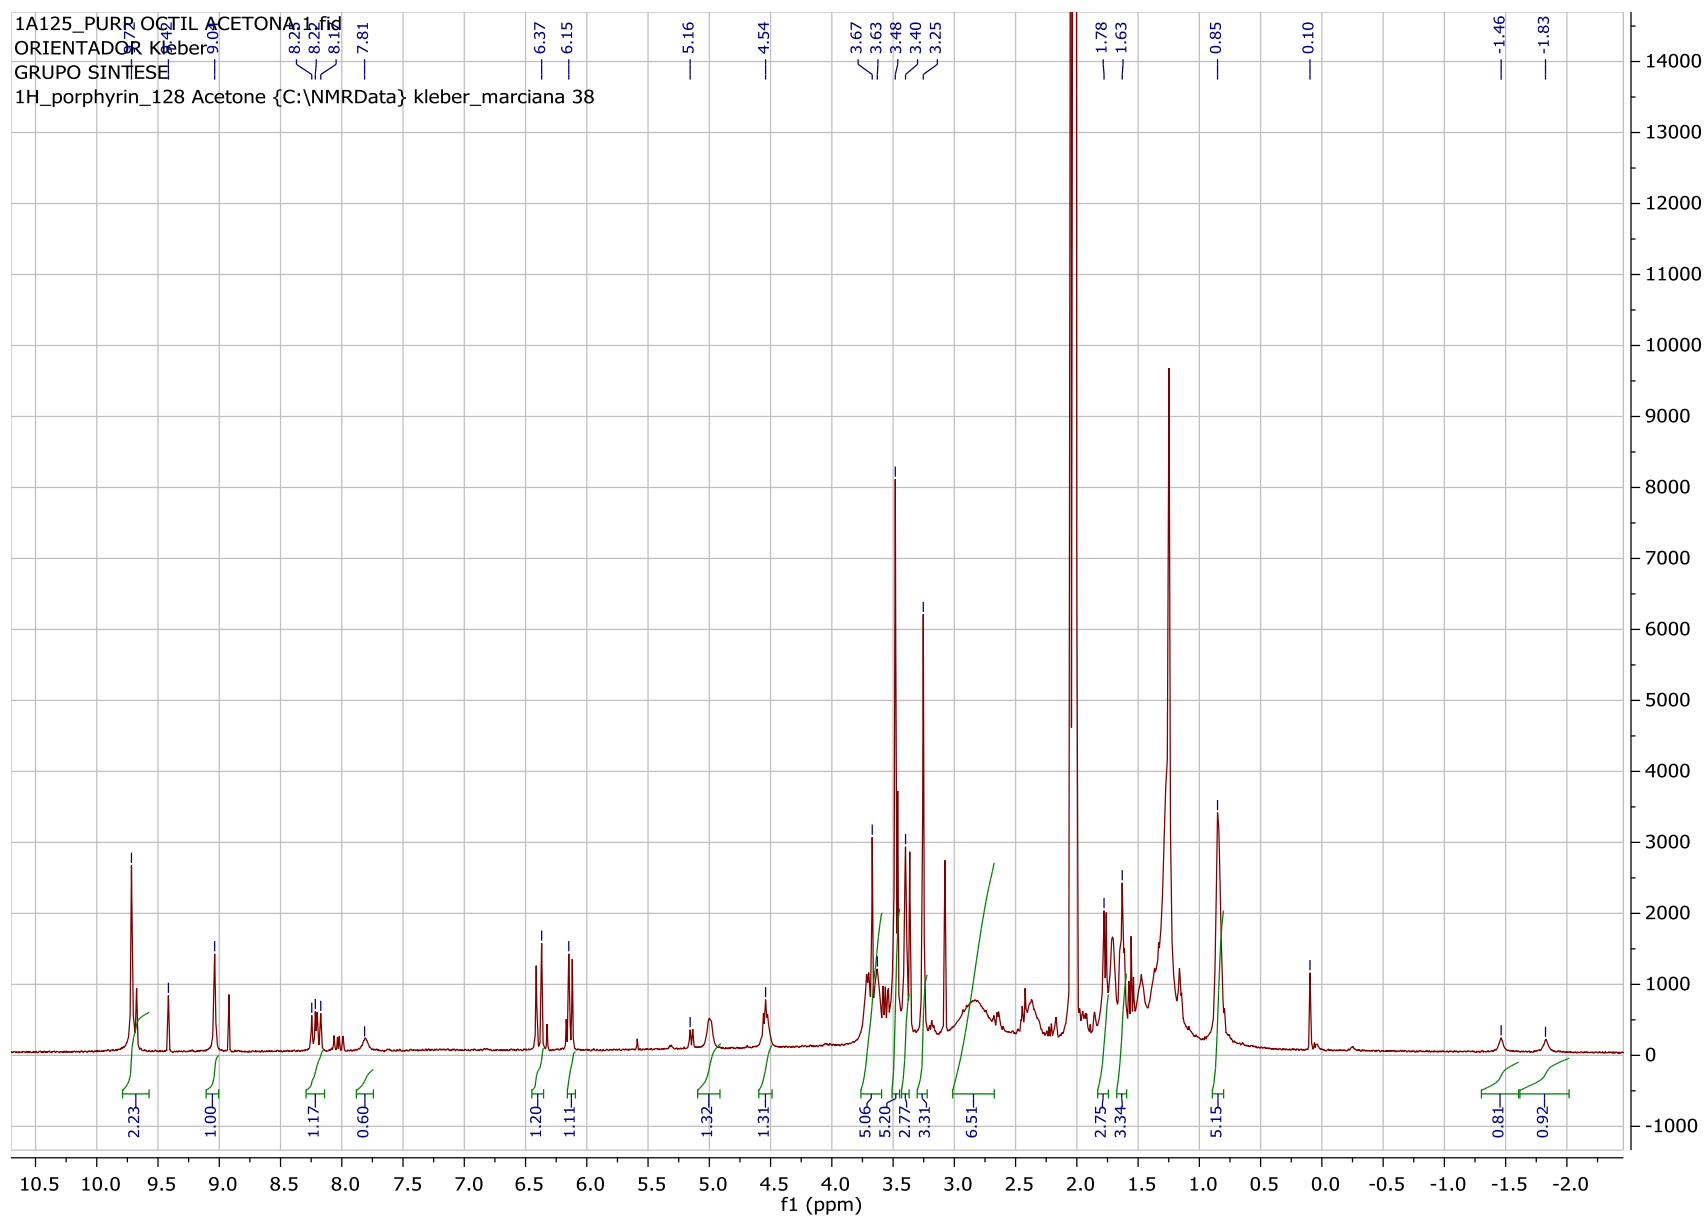

**Figure S15:**  $^1\text{H}$ -NMR ( $\text{CDCl}_3$ ) spectrum of Chlorin-p, 6-N-octylamide-7-methyl Ester (**8**)



purpurina octil(+)\_150110103539 #1 RT: 0.01 AV: 1 NL: 2.03E7  
T: FTMS + p ESI Full ms [650.00-750.00]

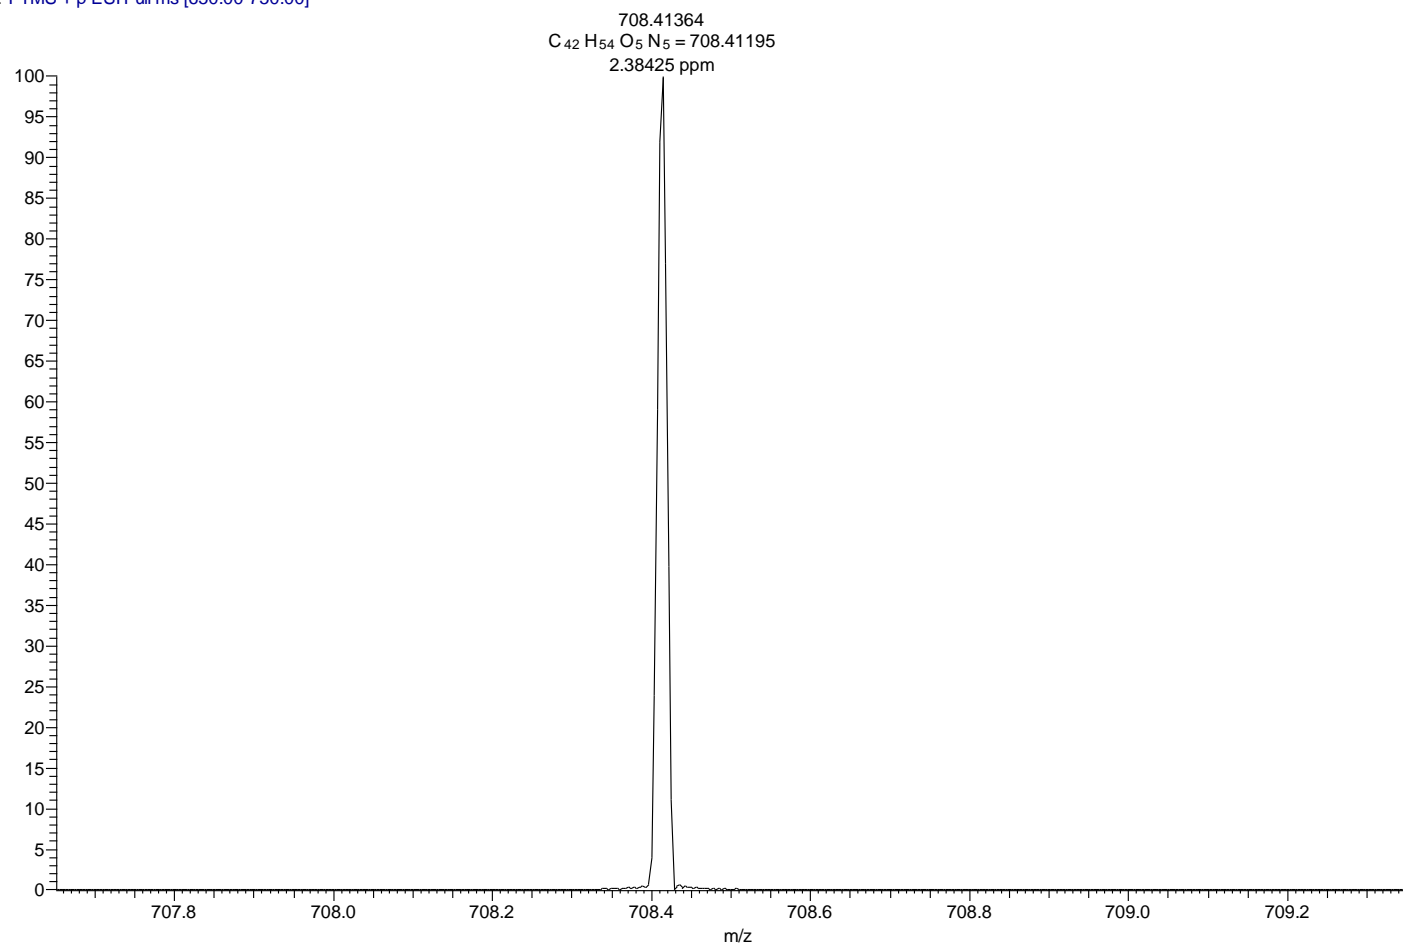

**Figure S16:** HRMS (ESI) of Chlorin-p, 6-N-octylamide-7-methyl Ester (**8**)

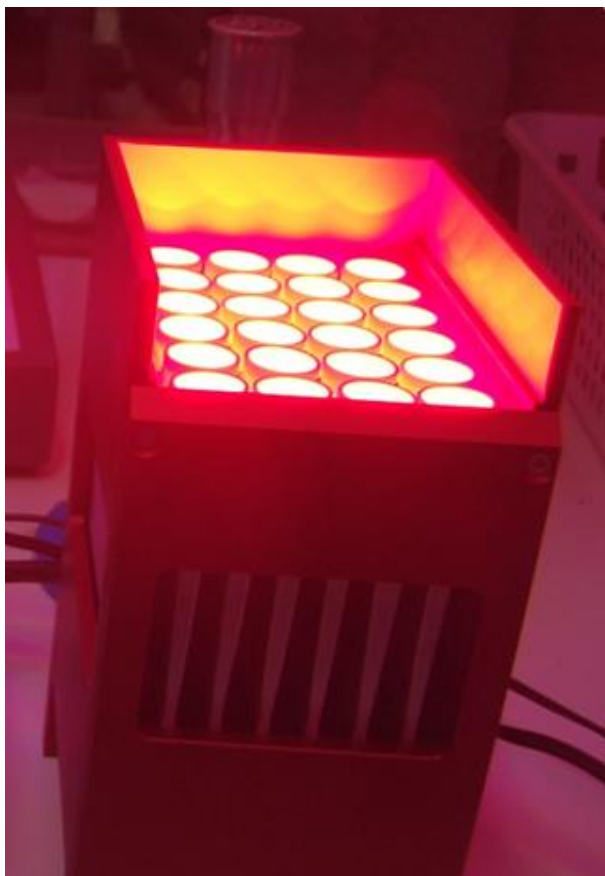

**Figure S17:** Homemade engineered Biotable model for PDI studies (660 nm).

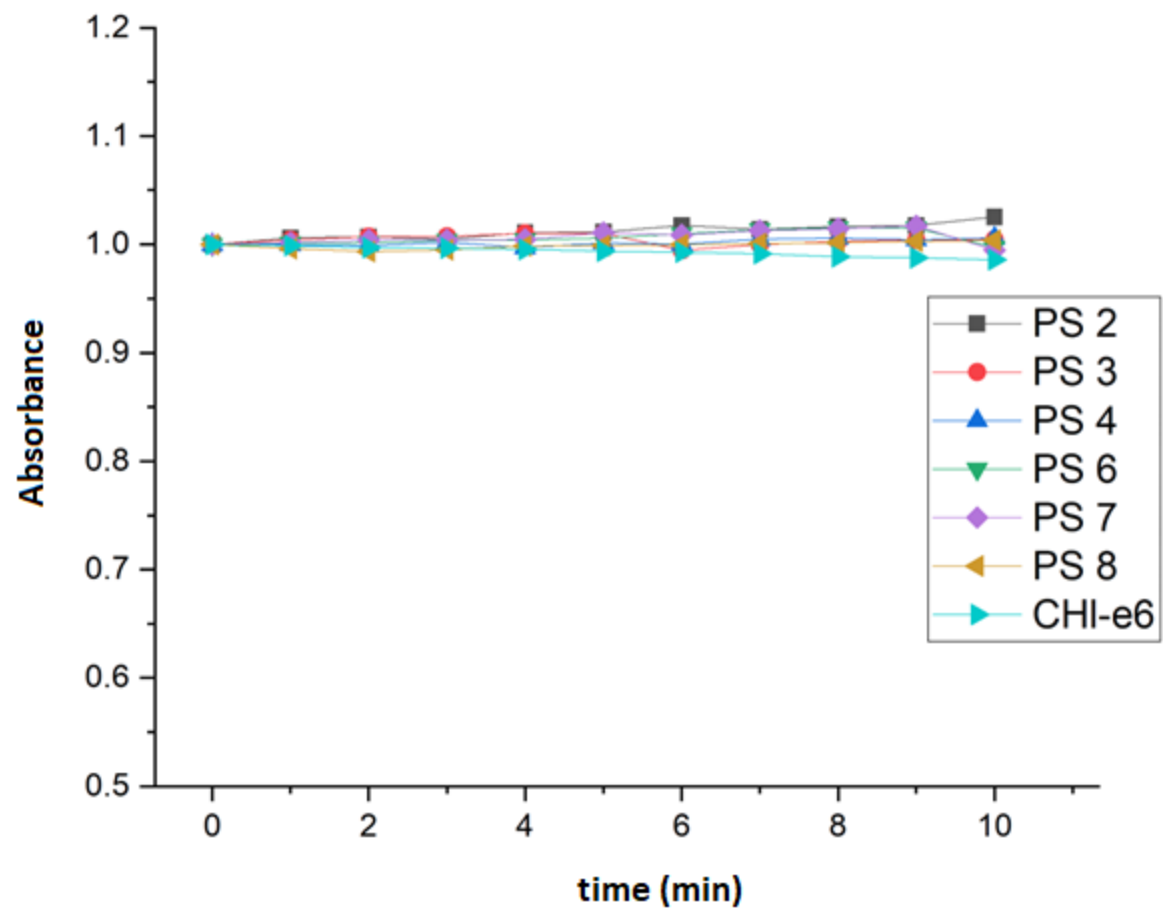

**Figure S18:** Photodegradation experiment at 660 nm at 63.7 mWcm<sup>-2</sup> using ethyl acetate as solvent.

**Table S1:** Wavelengths data and Quantum yield of Singlet Oxygen  $^1\text{O}_2$  data of the literature for some of the compounds.

| PS                                                      | Our work (UV-Vis)                                                                       | Literature data (UV-Vis) and<br>Literature data<br>Quantum yield of singlet oxygen $^1\text{O}_2$                                                                                                                                                                                                          |
|---------------------------------------------------------|-----------------------------------------------------------------------------------------|------------------------------------------------------------------------------------------------------------------------------------------------------------------------------------------------------------------------------------------------------------------------------------------------------------|
| Methyl pheophorbide-a (1)                               | $\lambda_{\text{max}}$ ( $\text{CH}_2\text{Cl}_2$ ) (nm): 666, 609, 534, 505, 409.      | $\lambda_{\text{max}}$ ( $\text{CH}_2\text{Cl}_2$ ) 668 (44 600), 610 (8 620), 538 (9 710), 506 (10 800), 412 (106 000) <sup>1</sup><br><br>Quantum yield of singlet oxygen $^1\text{O}_2$<br>0.44 (in benzene); 0.47 (in 1-octanol) <sup>2</sup>                                                          |
| 13-(Butylcarbamoyl)-chlorin e6 15,17-dimethyl ester (2) | $\lambda_{\text{max}}$ ( $\text{CH}_2\text{Cl}_2$ ) (nm): 662, 607, 528, 498, 399.      | $\lambda_{\text{max}}$ , nm ( $\text{CHCl}_3$ ) 664, 608, 558, 529, 501 402. <sup>3</sup>                                                                                                                                                                                                                  |
| 13-(Hexylcarbamoyl)chlorin e6 15,17-dimethyl ester (3)  | $\lambda_{\text{max}}$ ( $\text{CH}_2\text{Cl}_2$ ) (nm): 663, 605, 527, 497, 398.      | $\lambda$ , nm ( $\text{CHCl}_3$ ): 664, 609, 558, 528, 501, 402. <sup>3</sup>                                                                                                                                                                                                                             |
| 13-(Octylcarbamoyl)chlorin e6 15,17-dimethyl ester (4)  | $\lambda_{\text{max}}$ ( $\text{CH}_2\text{Cl}_2$ ) (nm): 663, 609, 527, 497, 399.      | UV-vis ( $\text{CHCl}_3$ ): $\lambda$ , nm (log $\epsilon$ ) 664, 607, 558, 530, 502, 402. <sup>3</sup>                                                                                                                                                                                                    |
| Purpurin-18 Methyl Ester (5)                            | $\lambda_{\text{max}}$ ( $\text{CH}_2\text{Cl}_2$ ) (nm): 699, 642, 546, 508, 478, 410. | $\lambda_{\text{max}}$ (nm) ( $\text{CHCl}_3$ ): ( $\epsilon \cdot 10^{-3}$ ): 360 (22.9); 413 (44.6); 481 (1.9); 510 (3.9); 548 (10.9); 646 (4.7); 701 (23.2) <sup>4</sup><br><br>Quantum yield of singlet oxygen $^1\text{O}_2$<br>0.55 (in ethanol); 0.73 (in toluene); 0.80 (in pyridine) <sup>5</sup> |
| Chlorin-p, 6-N-Butylamide-7-methyl Ester (6)            | $\lambda_{\text{max}}$ ( $\text{CH}_2\text{Cl}_2$ ) (nm): 662, 606, 526, 498, 398.      | $\lambda_{\text{max}}/\text{nm}$ 664 ( $\epsilon$ 4.56 x 10 <sup>4</sup> ), 608 (1.08 x 10 <sup>4</sup> ), 532(1.13 x 10 <sup>4</sup> ), 500(1.90 x 10 <sup>4</sup> ) and 404(1.37 x 10 <sup>5</sup> ) <sup>6</sup>                                                                                        |

|                                              |                                                                                   |                                                                                                                                                                                                                                        |
|----------------------------------------------|-----------------------------------------------------------------------------------|----------------------------------------------------------------------------------------------------------------------------------------------------------------------------------------------------------------------------------------|
| Chlorin-p, 6-N-hexylamide-7-methyl Ester (7) | $\lambda_{max}$ (CH <sub>2</sub> Cl <sub>2</sub> ) (nm): 666, 608, 528, 497, 398. | $\lambda_{max}$ THF/CH <sub>2</sub> Cl <sub>2</sub> (1:4) (nm): 666 (1.78 x 10 <sup>4</sup> ), 612 (1.85 x 10 <sup>3</sup> ), 528 (1.73 x 10 <sup>3</sup> ), 498 (4.92 x 10 <sup>3</sup> ), 402 (5.11 x 10 <sup>4</sup> ) <sup>7</sup> |
| Chlorin-p, 6-N-octylamide-7-methyl Ester (8) | $\lambda_{max}$ (CH <sub>2</sub> Cl <sub>2</sub> ) (nm): 663, 605, 528, 499, 399. | Don't have this data                                                                                                                                                                                                                   |

## Reference:

<sup>1</sup> Ma, L.; Dolphin, D.; Nucleophilic reaction of 1,8- diazabicyclo[5.4.0]undec-7-ene and 1,5- diazabicyclo[4.3.0]non-5-ene with methyl pheophorbide a. Unexpected products. *Tetrahedron*, **1996**, 52 (3), 849-860. [https://doi.org/10.1016/0040-4020\(95\)00944-2](https://doi.org/10.1016/0040-4020(95)00944-2).

<sup>2</sup> Kustov, A. V.; Belykh, D. V.; Startseva, O. M.; Kruchin, S. O.; Venediktov, E. A.; Berezin, D. B. *Pharm Anal Acta*. **2016**, 7(5), 1-5. <https://doi.org/10.4172/2153-2435.1000480>.

<sup>3</sup> Belykh, D. V.; Tarabukina, I. S.; Gruzdev, I. V.; Kodess, M. I.; Kutchin, A. V. Aminomethylation of chlorophyll a derivatives using bis(N,N-dimethylamino)methane. *Porphyrins Phthalocyanines* **2009**, 13, 949–956. <https://doi.org/10.1142/S1088424609001133>.

<sup>4</sup> Drohat, N.; Barriere, M.; Granet, R.; Sol, V.; Krausz, P. High yield preparation of purpurin-18 from *Spirulina maxima*. *Dyes Pigm.* **2011**, 88 (1), 125-127, <https://doi.org/10.1016/j.dyepig.2010.05.006>.

<sup>5</sup> Redmond, R. W.; Gamlin, J. N. A Compilation of Singlet Oxygen Yields from Biologically Relevant Molecules. *Photochem. Photobiol.* **1999**, 70 (4), 391- 475. <https://doi.org/10.1111/j.1751-1097.1999.tb08240.x>

<sup>6</sup> Lee, S. J. H.; Jagerovic, N.; Smith, K. M. Use of the Chlorophyll derivative, Purpurin-18, for Syntheses of Sensitizers for use in Photodynamic Therapy. *Journal of the Chemical Society-Perkin Transactions 1*. **1993**, (19), 2369-2377. <https://doi.org/10.1039/p19930002369>

<sup>7</sup> Journal of Medicinal Chemistry (2001), 44(10), 1540-1559. <https://scifinder-n-cas.ez350.periodicos.capes.gov.br/searchDetail/reaction/62fbd8f0fd474116c001ae34/reactionDetails> CAS Method Number 3-366-CAS-9701836
